# Supplementary material for: SIRPα controls CD47-dependent platelet clearance in mice and humans
Source: PubMed Central journal article supplement — bioRxiv. 2023 Dec 10:2023.12.09.570874. Preprint. [Version 1] doi: 10.1101/2023.12.09.570874 (PMC10723388; doi:10.1101/2023.12.09.570874), 2023-12-10

## Supplementary figures

PheWAS associations with CD47-BBX locus SNP rs167924.

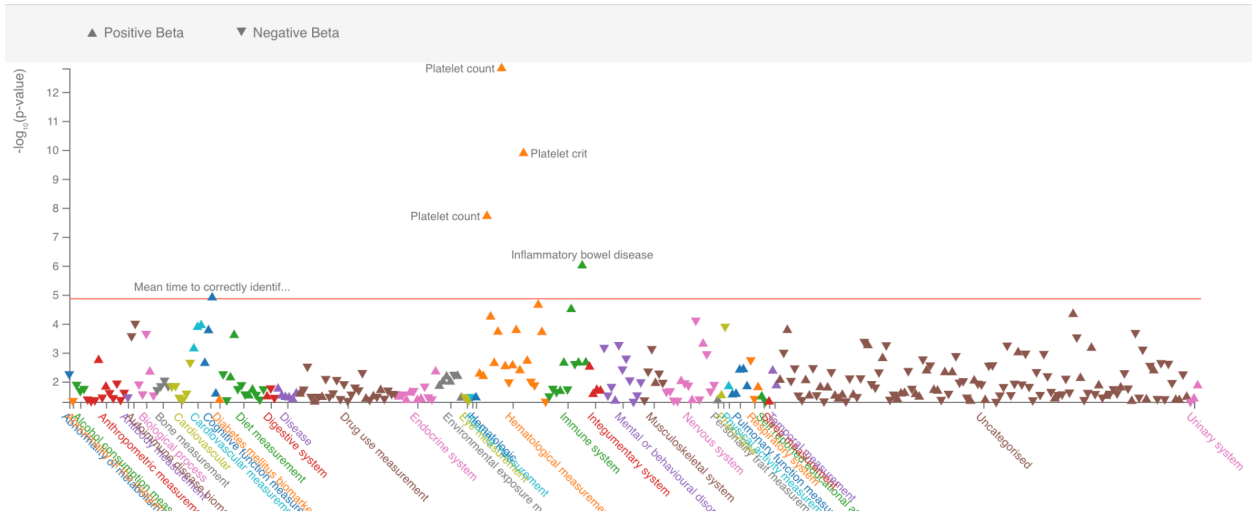

## Platelet meta-analysis manhattan plot

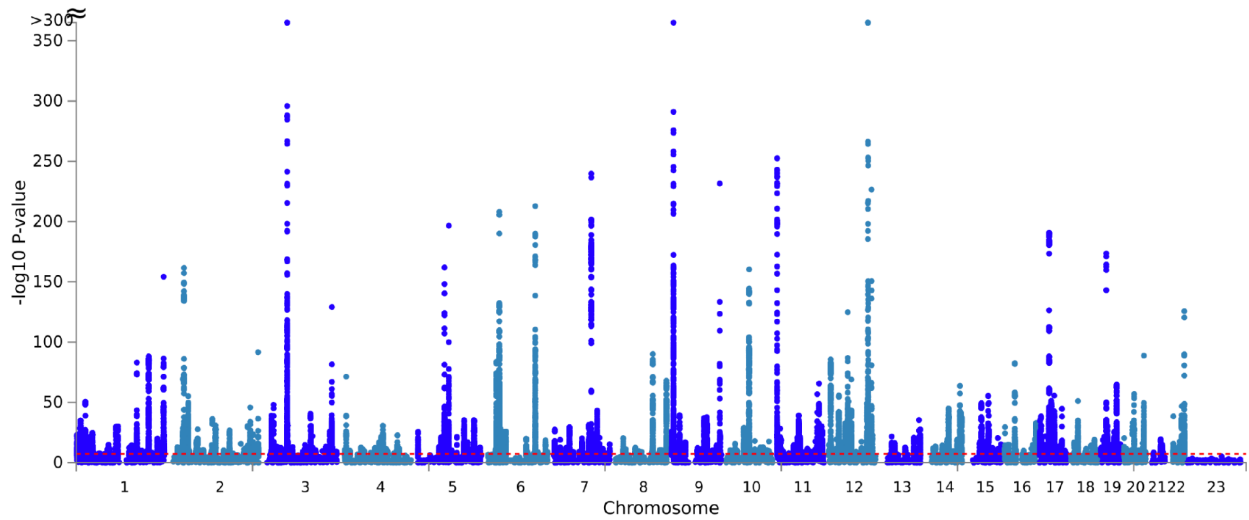

Supplement: media-4.pdf [file media-4.pdf]
